# Supplementary material for: Lived Experiences of Patients with Chronic Kidney Disease Receiving Hemodialysis in Felege Hiwot Comprehensive Specialized Hospital, Northwest Ethiopia
Source: Int J Nephrol. 2021 Aug 25;2021:6637272. doi: 10.1155/2021/6637272 (PMC8410445; doi:10.1155/2021/6637272)
Supplement: Supplementary Materials — Supplement document 1: Filled Consolidated Criteria for Reporting Qualitative Studies (COREQ) checklist Supplement document 2: Information sheet and Consent form Supplement document 3: Interview Guide. [file 6637272.f1.zip]

Archive with 3 entries (3 files):
- Supplement 1-Filled COREQ Checklist.docx
- Supplement 2-Information sheet and consent form.docx
- Supplement 3-Interview Guide.docx
